# Supplementary material for: AAV-Mediated Gene Augmentation Therapy Restores Critical Functions in Mutant PRPF31+/− iPSC-Derived RPE Cells
Source: PubMed Central journal article supplement — Mol Ther Methods Clin Dev. 2019 Nov 11;15:392–402. doi: 10.1016/j.omtm.2019.10.014 (PMC6909184; doi:10.1016/j.omtm.2019.10.014), 2019-11-11
Supplement: mmc1.pdf [file mmc1.pdf]

**OMTM, Volume 15**

**Supplemental Information**

**AAV-Mediated Gene Augmentation**

**Therapy Restores Critical Functions**

**in Mutant PRPF31<sup>+/-</sup> iPSC-Derived RPE Cells**

**Elizabeth M. Brydon, Revital Bronstein, Adriana Buskin, Majlinda Lako, Eric A. Pierce, and Rosario Fernandez-Godino**

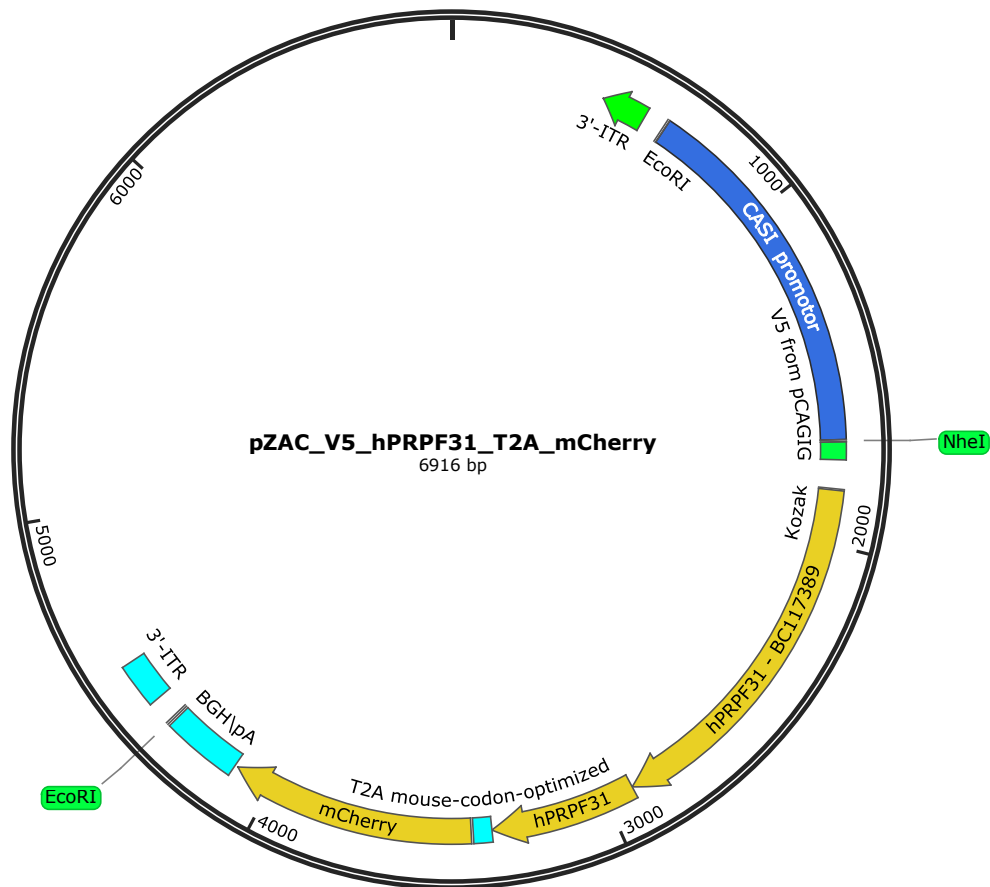

**Figure S1.** Map of the AAV vector used for AAV-mediated expression of PRPF31 in iPSC-RPE cells.

iPSC-RPE *PRPF31*<sup>+/-</sup> no AAV

iPSC-RPE *PRPF31*<sup>+/-</sup> +AAV-mCherry

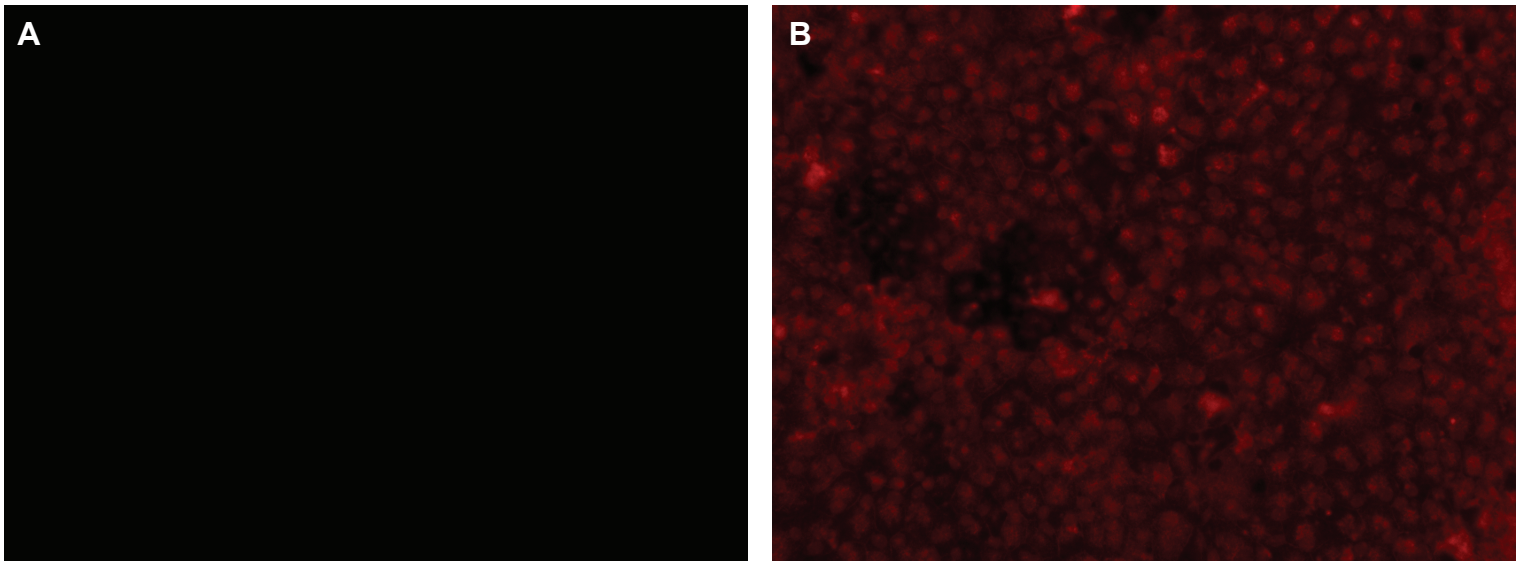

C

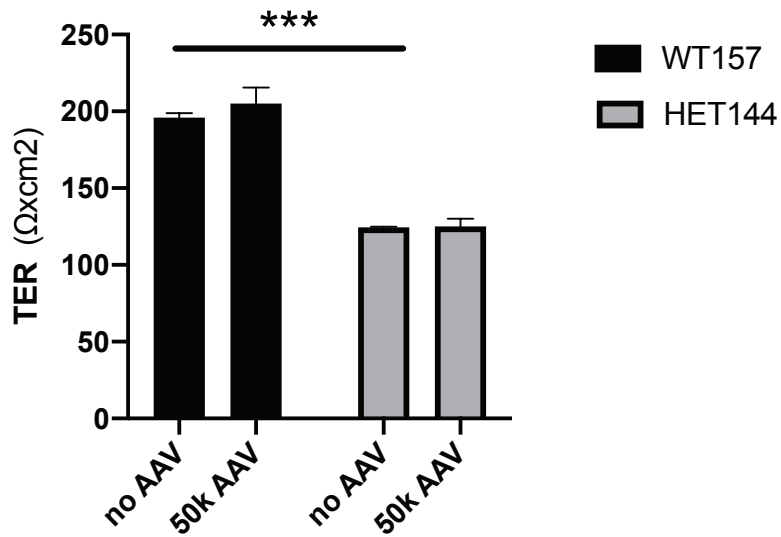

**Figure S2.** (A) iPSC-RPE control and (B) treated with 50,000 GC/cell of AAV-*PRPF31* imaged with confocal. AAV-derived mCherry fluorescent signal shows that AAV targeted most of the cells. (C) TER of iPSC-RPE *PRPF31*<sup>+/+</sup> and *PRPF31*<sup>+/-</sup> cells on transwells with and without treatment with AAV-*PRPF31*. (n=4/type. 2-way ANOVA. \*\*\*p<0.001. Data represented as mean +/- SD).

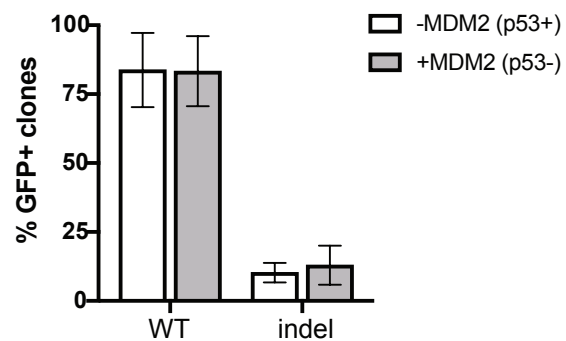

**Figure S3.** Percentage of GFP positive iPSCs with and without indels in PRPF31 after transfection with the plasmid containing Cas9 and the gRNA 1 in the absence (white bars) or presence (grey bars) of the p53 antagonist MDM2 (2-way ANOVA. Data represented as mean  $\pm$  SD).
